# Supplementary material for: Keratin 6a reorganization for ubiquitin–proteasomal processing is a direct antimicrobial response
Source: PubMed Central journal article supplement — J Cell Biol. 2018 Feb 5;217(2):731–44. doi: 10.1083/jcb.201704186 (PMC5800800; doi:10.1083/jcb.201704186), 2018-02-05
Supplement: JCB_201704186_sm.pdf [file JCB_201704186_sm.pdf]

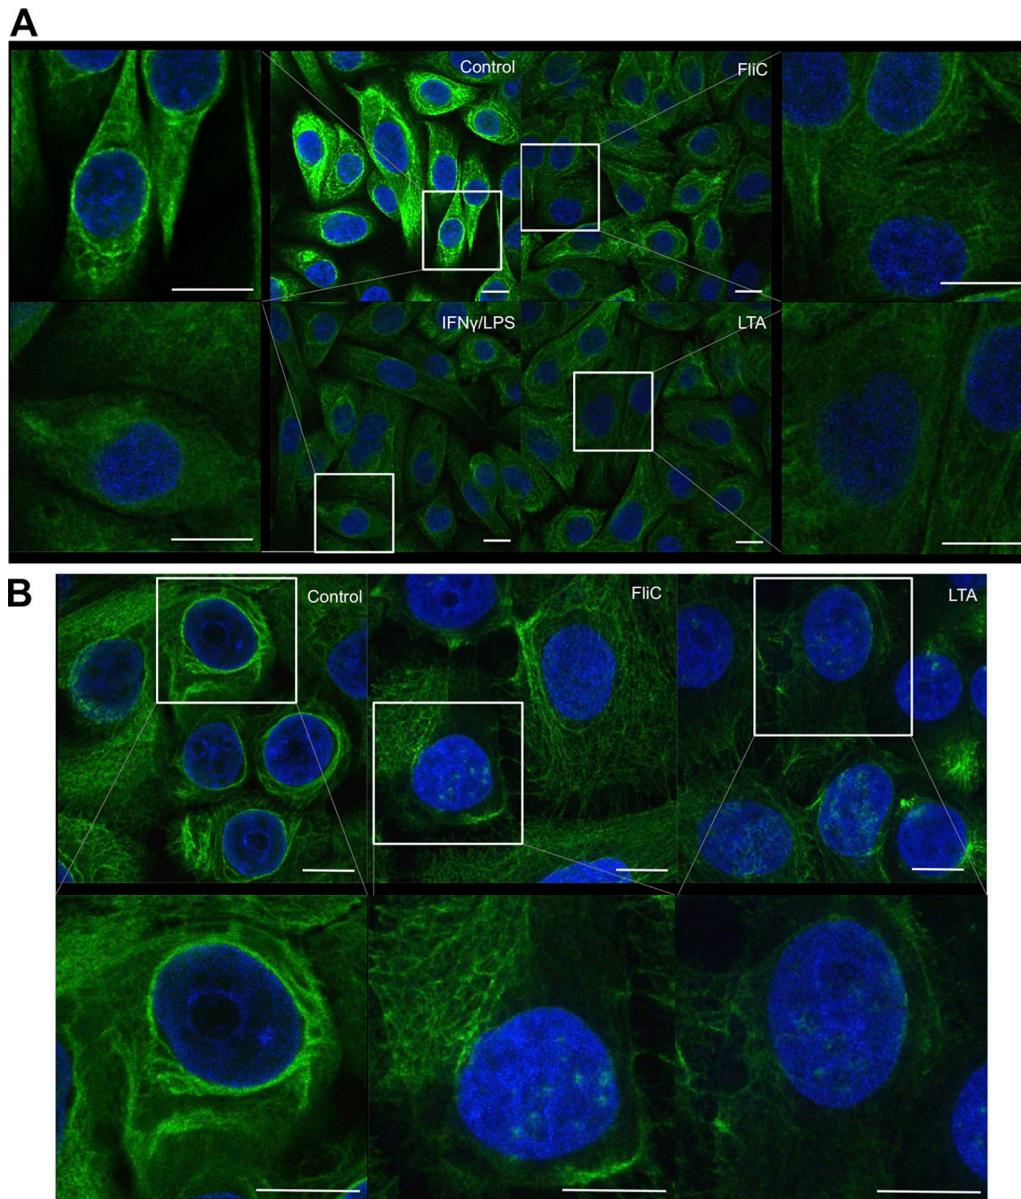

Figure S1. **Human mammary epithelial cells (hTERT-HME1) and ectocervical epithelial cells (Ect1/E6E7) demonstrate depolymerization of the filamentous K6a network in response to bacterial ligands.** (A) Confocal microscopic images of hTERT-HME1 cells treated for 16 h with vehicle control, LTA (1  $\mu$ g/ml), flagellin (FliC; 0.5  $\mu$ g/ml) or LPS (1  $\mu$ g/ml); pretreated with 250 ng/ml IFN- $\gamma$  for 2 h). The intense filamentous K6a network staining surrounding the nucleus in the control cell (inset) became diffused and weak after stimulation with bacterial ligands. (B) Ect1/E6E7 cells were treated as described in A. Similar observations were made for Ect1/E6E7 cells. Note that Ect1/E6E7 cells do not express TLR-4. Bars, 10  $\mu$ m.

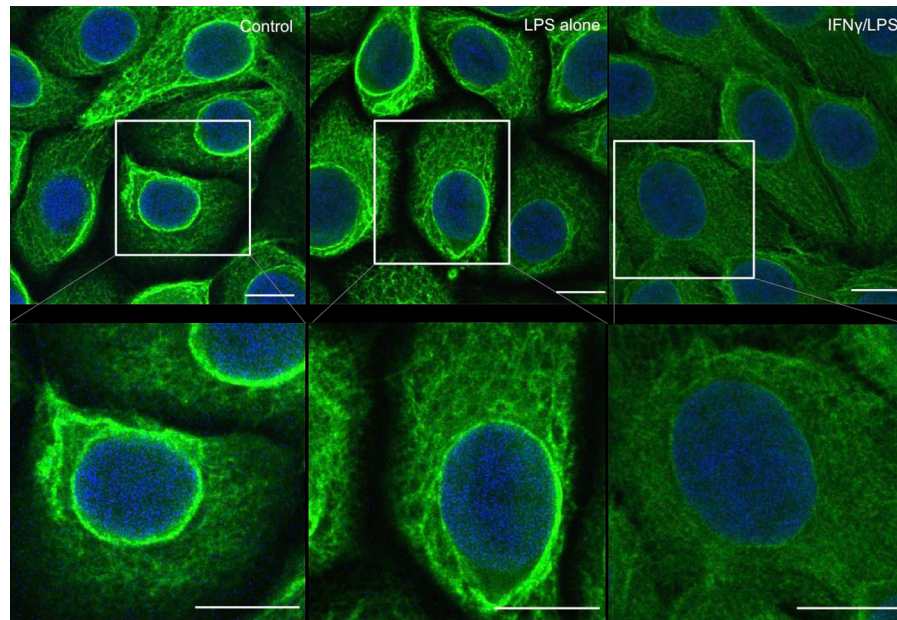

Figure S2. **LPS-induced depolymerization of the filamentous K6a network does not occur in epithelial cells with low expression of TLR-4 coreceptor MD-2.** Confocal microscopic images of hTCEpi cells treated for 16 h with vehicle control or LPS (1  $\mu\text{g}/\text{ml}$ ) with or without preincubation with IFN- $\gamma$  (250 ng/ml; 2 h). Normal hTCEpi cells produce low levels of MD-2 and are unresponsive to LPS. A 2-h pretreatment with IFN- $\gamma$  was used to induce MD-2 expression and LPS responsiveness. The filamentous K6a network staining (green) surrounding the nucleus (blue) in the control cells (left) and in cells treated with LPS alone (middle) was intense; on the contrary, the filamentous network staining in cells primed with IFN- $\gamma$  before LPS stimulation (right) was diffused and weak. Bars, 10  $\mu\text{m}$ .

**A**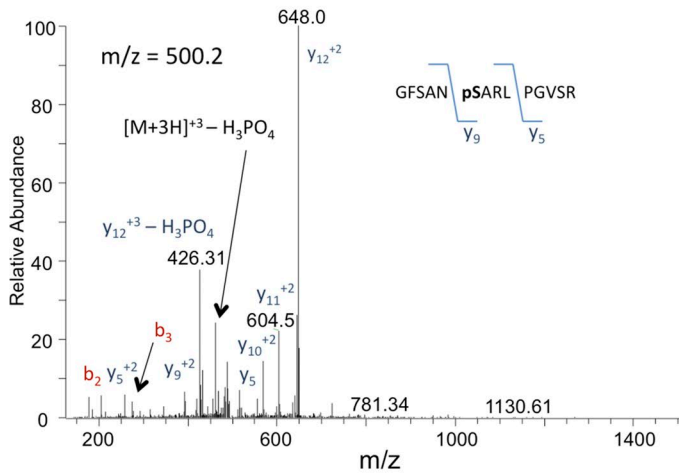

| b - H <sub>3</sub> PO <sub>4</sub><br>Da | b ion<br>Da |    | y ion<br>Da | y - H <sub>3</sub> PO <sub>4</sub><br>Da |
|------------------------------------------|-------------|----|-------------|------------------------------------------|
| --                                       | --          | G  | --          | --                                       |
| --                                       | 205         | F  | 1441        | 1343                                     |
| --                                       | 292         | S  | 1294        | 1196                                     |
| --                                       | 363         | A  | 1207        | 1109                                     |
| --                                       | 477         | N  | 1136        | 1038                                     |
| 546                                      | 644         | pS | 1022        | 924                                      |
| 617                                      | 715         | A  | 855         | --                                       |
| 773                                      | 871         | R  | 784         | --                                       |
| 886                                      | 984         | L  | 628         | --                                       |
| 983                                      | 1081        | P  | 515         | --                                       |
| 1040                                     | 1138        | G  | 418         | --                                       |
| 1140                                     | 1238        | V  | 361         | --                                       |
| 1226                                     | 1324        | S  | 262         | --                                       |
| --                                       | --          | R  | 175         | --                                       |

**B**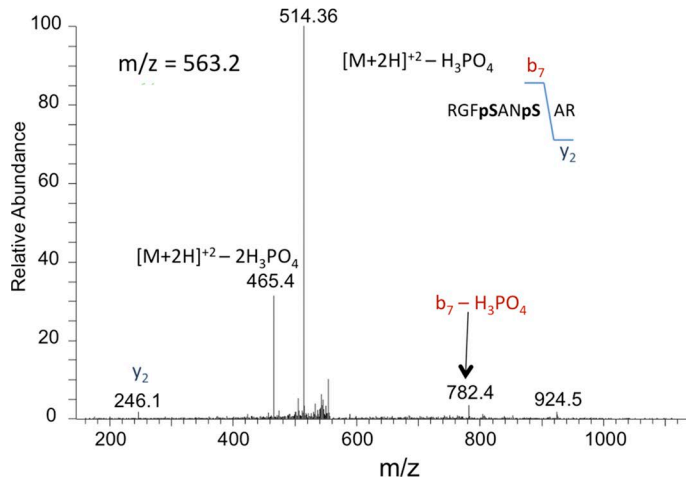

| b - H <sub>3</sub> PO <sub>4</sub><br>Da | b ion<br>Da |    | y ion<br>Da | y - H <sub>3</sub> PO <sub>4</sub><br>Da |
|------------------------------------------|-------------|----|-------------|------------------------------------------|
| --                                       | --          | R  | --          | --                                       |
| --                                       | 214         | G  | 969         | 871                                      |
| --                                       | 361         | F  | 912         | 814                                      |
| 430                                      | 528         | pS | 765         | 667                                      |
| 501                                      | 599         | A  | 598         | 501                                      |
| 615                                      | 713         | N  | 527         | 429                                      |
| 782                                      | 880         | pS | 413         | 315                                      |
| 853                                      | 951         | A  | 246         | --                                       |
| --                                       | --          | R  | 175         | --                                       |

Figure S3. **Tandem mass spectrometry spectra of K6a phosphopeptides with a single phosphorylation at Ser-22 or double phosphorylation at Ser-19 and Ser-22.** (A and B) K6a was subjected to tryptic digestion, and these tryptic digests were analyzed by LC-MS looking for K6a phosphopeptides. (A) The tandem mass spectrometry spectrum for a phosphopeptide GFSANSARLPGVSR with a single phosphorylation at Ser-22 is shown. The m/z of 500.2 is consistent with the triply charged GFSANSARLPGVSR + PO<sub>3</sub> peptide. The difference of m/z values between y<sub>9</sub> and y<sub>5</sub> ions is consistent with a modification on S22. (B) The tandem mass spectrometry spectrum for a phosphopeptide RGFpSANSAR with double phosphorylation at Ser-19 and Ser-22 is shown. The m/z of 563.2 is consistent with the doubly charged RGFpSANSAR + 2 PO<sub>3</sub> peptide. The tandem mass spectrometry spectra are dominated by two spikes corresponding with one and two losses of H<sub>3</sub>PO<sub>4</sub> from the [M + 2 H]<sup>+2</sup> ion (i.e., m/z 514.36 and 465.4). This is consistent with two sites of serine phosphorylation in this peptide. The m/z values of b<sub>7</sub>-H<sub>3</sub>PO<sub>4</sub> and y<sub>2</sub> ions are consistent with modifications at S19 and S22.

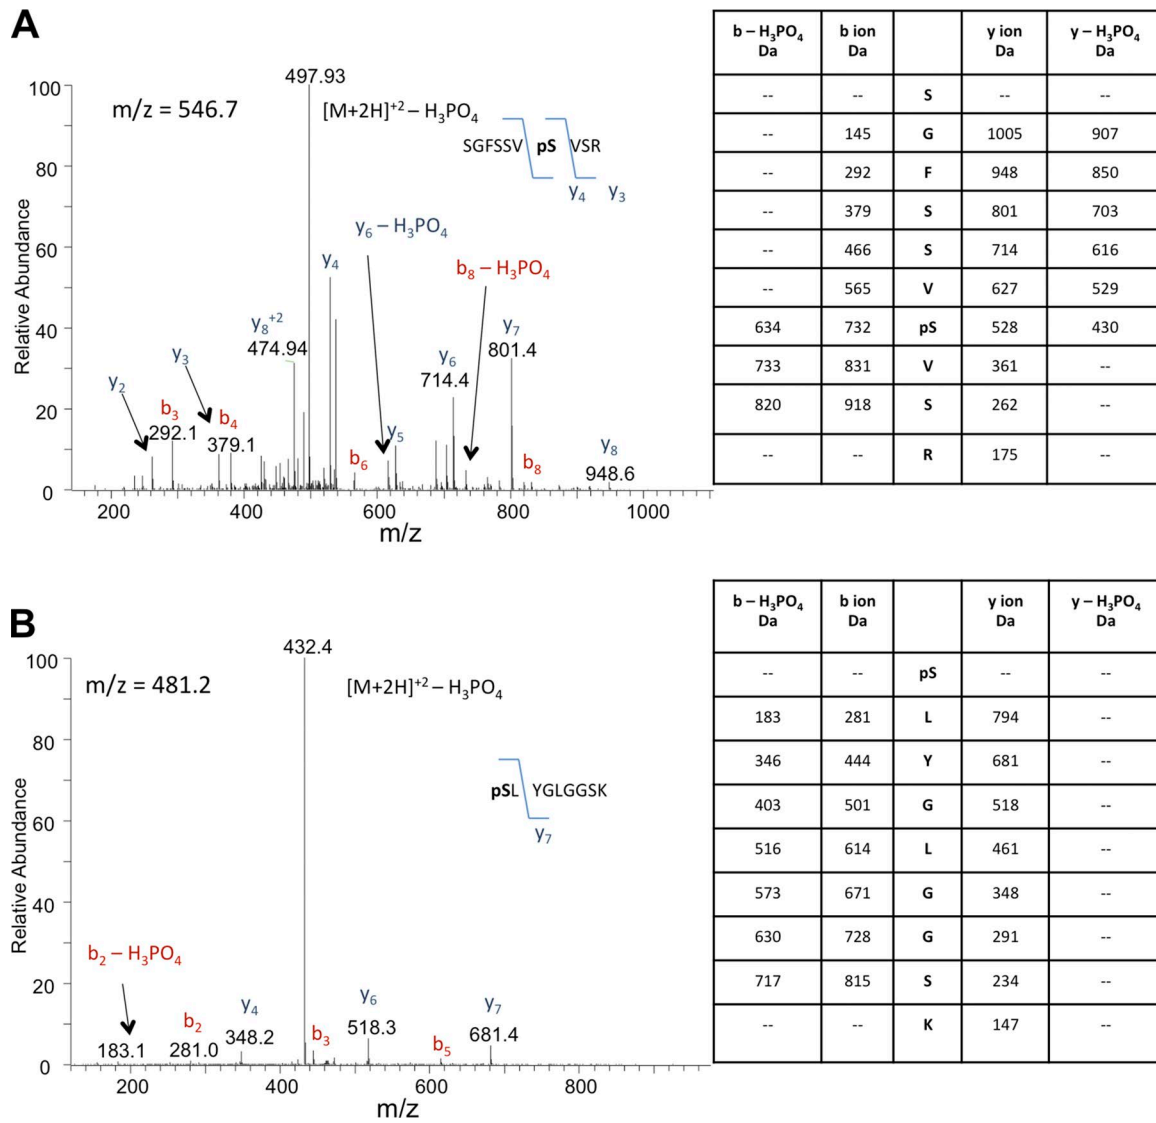

Figure S4. **Tandem mass spectrometry spectra of K6a phosphopeptides with a single phosphorylation at Ser-37 or Ser-60.** (A and B) K6a was subjected to tryptic digestion, and these tryptic digests were analyzed by LC-MS looking for K6a phosphopeptides. (A) The tandem mass spectrometry spectrum for a phosphopeptide SGFSSVSR with a single phosphorylation at Ser-37 is shown. The  $m/z$  of 546.7 is consistent with the doubly charged SGFSSVSR + PO<sub>3</sub> peptide. The difference of  $m/z$  values between  $y_3$  and  $y_4$  ions is consistent with a modification on S37. (B) The tandem mass spectrometry spectrum for a phosphopeptide SLYGLGGSK with a single phosphorylation at Ser-60 is shown. The  $m/z$  of 481.2 is consistent with the doubly charged SLYGLGGSK + PO<sub>3</sub> peptide. The  $m/z$  values of  $b_2$  and  $y_7$  ions are consistent with a modification on S60.

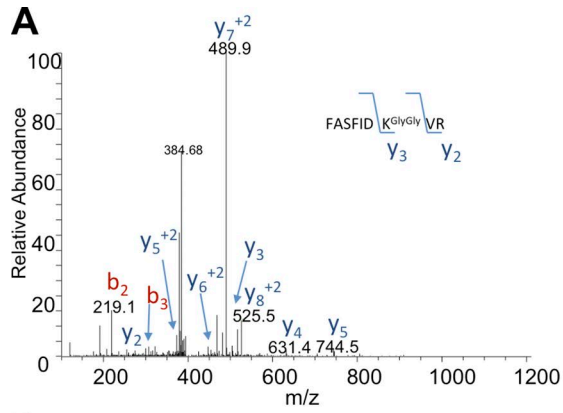

| b ion Da |                 | y ion Da |
|----------|-----------------|----------|
| --       | F               | --       |
| 219      | A               | 1049     |
| 306      | S               | 978      |
| 453      | F               | 891      |
| 566      | I               | 744      |
| 681      | D               | 631      |
| 923      | K <sup>PH</sup> | 516      |
| 1022     | V               | 274      |
| --       | R               | 175      |

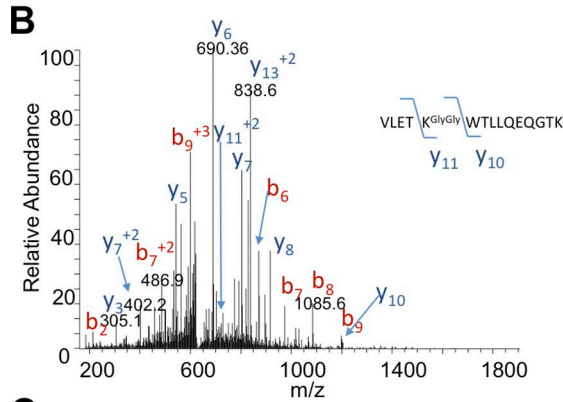

| b ion Da |                 | y ion Da |
|----------|-----------------|----------|
| --       | V               | --       |
| 213      | L               | 1788     |
| 342      | E               | 1675     |
| 443      | T               | 1546     |
| 685      | K <sup>PH</sup> | 1445     |
| 871      | W               | 1203     |
| 972      | T               | 1017     |
| 1085     | L               | 916      |
| 1198     | L               | 803      |
| 1326     | Q               | 690      |
| 1455     | E               | 562      |
| 1583     | Q               | 433      |
| 1640     | G               | 305      |
| 1741     | T               | 248      |
| --       | K               | 147      |

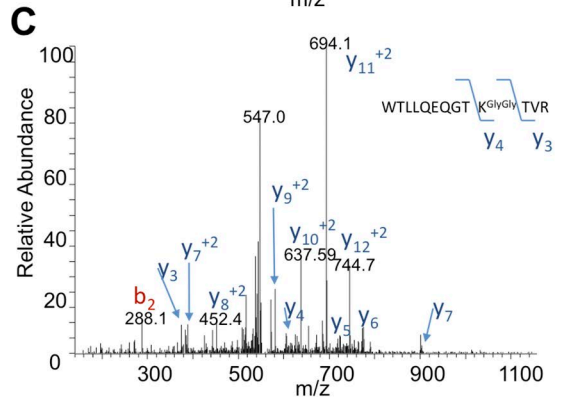

| b ion Da |                 | y ion Da |
|----------|-----------------|----------|
| --       | W               | --       |
| 288      | T               | 1487     |
| 401      | L               | 1386     |
| 514      | L               | 1273     |
| 642      | Q               | 1160     |
| 771      | E               | 1032     |
| 899      | Q               | 903      |
| 956      | G               | 775      |
| 1057     | T               | 718      |
| 1299     | K <sup>PH</sup> | 617      |
| 1400     | T               | 375      |
| 1499     | V               | 274      |
| --       | R               | 175      |

Figure S5. **Tandem mass spectrometry spectra of K6a peptides with ubiquitination at Lys-180, Lys-194, or Lys-204.** (A–C) K6a was subjected to tryptic digestion, and these tryptic digests were analyzed by LC-MS looking for K6a ubiquitinated peptides. (A) The tandem mass spectrometry spectrum for a triply charged peptide with an  $m/z$  of 399.6 is shown. The mass of this ion is consistent with the FASFIDKVR + GlyGly peptide. The mass difference between the  $y_3$  and  $y_2$  ions is consistent with modification at K180. (B) The tandem mass spectrometry spectrum for a triply charged peptide with an  $m/z$  of 630.0 is shown. The mass of this ion is consistent with the VLETKWTLLEQEGTK + GlyGly peptide. The mass difference between the C-terminal  $y_{11}$  and  $y_{10}$  ions is consistent with modification on K194. (C) The tandem mass spectrometry spectrum for a triply charged peptide with an  $m/z$  of 559.0 is shown. The mass of this ion is consistent with the WTLLEQEGTKVR + GlyGly peptide. The mass difference between the C-terminal  $y_3$  and  $y_4$  ions is consistent with modification on K204.
